# Supplementary material for: Sex-Based Clinical Outcome in Advanced NSCLC Patients Undergoing PD-1/PD-L1 Inhibitor Therapy—A Retrospective Bi-Centric Cohort Study
Source: MDPI journal article supplement (doi:10.3390/cancers14010093), 2021-12-24
Supplement: s1 [file s1]

**Supplementary analysis S1.** Statistical approach to the impact of numeric differences between men and women on progression-free and overall survival (PFS/OS)

**Problem:** The ratio between male and female patients is unequal, which may have influenced PFS and OS.

**Question:** Would PFS and OS change, if the ratio was equal?

**Results as presented in the original analysis:**

| cohort           | analysis | n   | n female   | Median (95% CI) female vs. male | p-value (log rank) |
|------------------|----------|-----|------------|---------------------------------|--------------------|
| ICI monotherapy  | PFS      | 228 | 92 (40.4%) | 3M (3-6) vs. 3M (3-5)           | 0.273              |
|                  | OS       | 228 | 92 (40.4%) | 10M (6-14) vs. 10M (8-14)       | 0.592              |
| ICI-chemotherapy | PFS      | 80  | 33 (41.3%) | 5M (3-NA) vs. 6M (5-10)         | 0.780              |
|                  | OS       | 80  | 33 (41.3%) | 10M (7-NA) vs. 15M (10-NA)      | 0.398              |

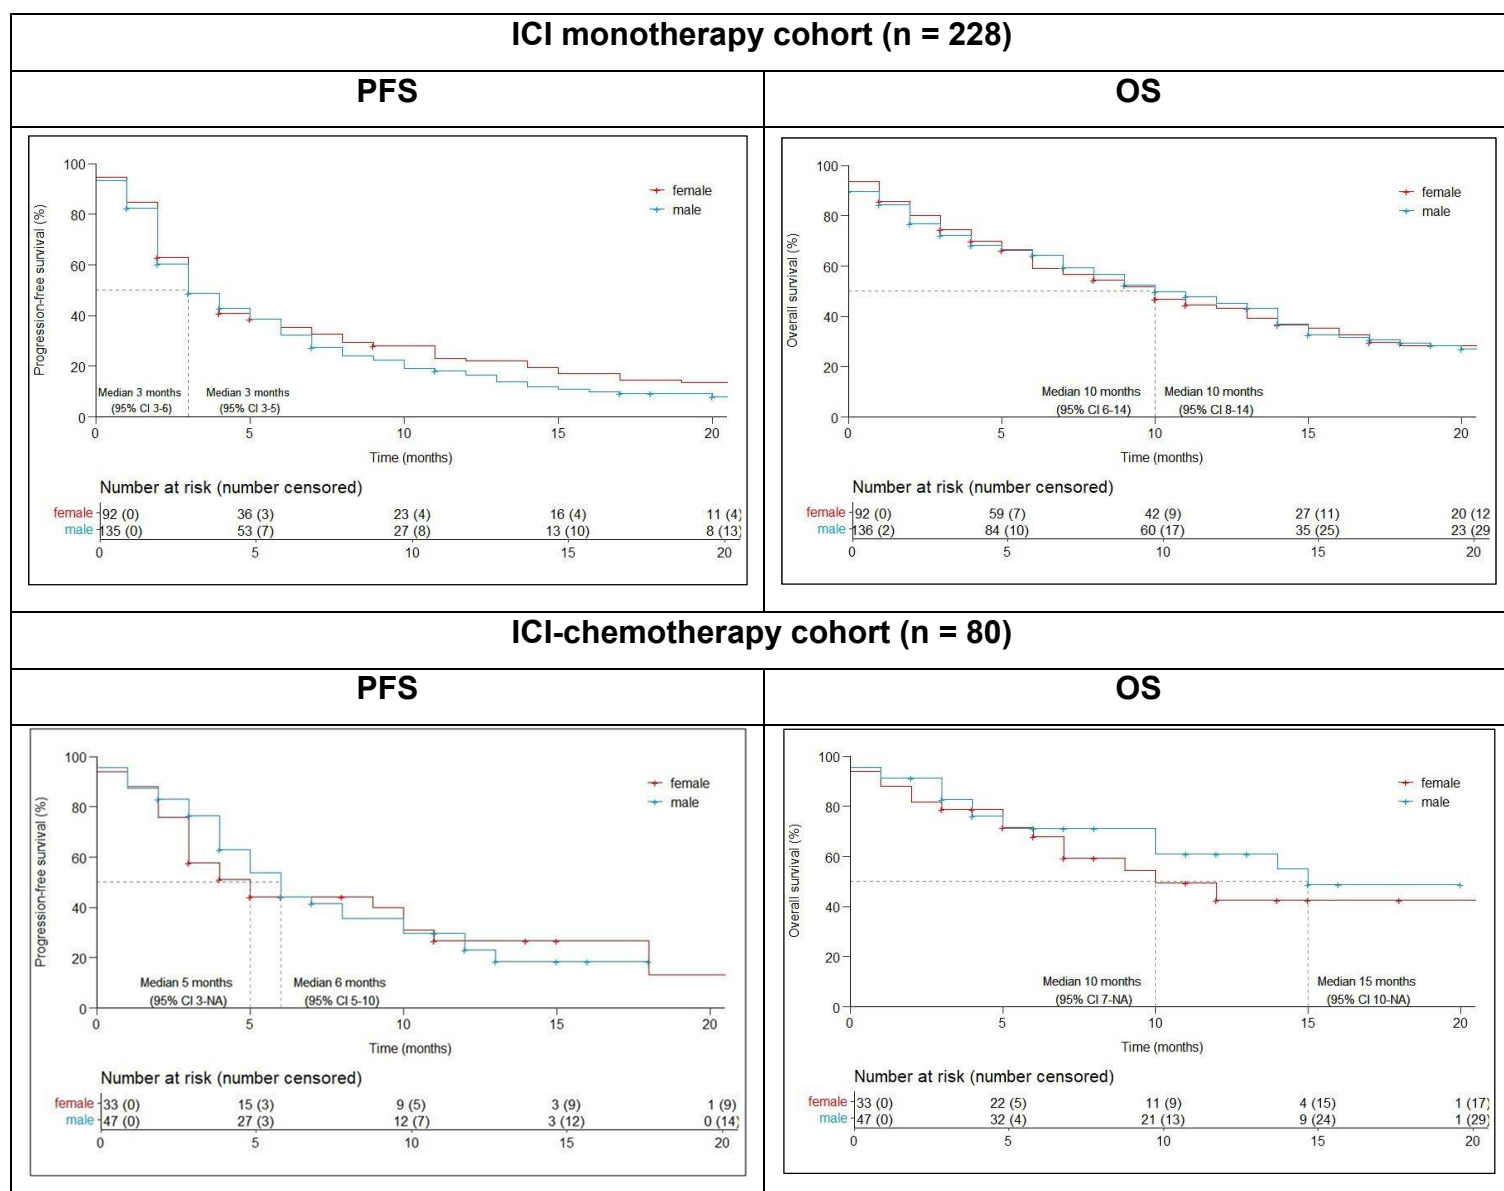

**Solution:** Extension of the current female patient datasets with simulated data.

**Methods:** The aim is to derive cohorts with a balanced male-to-female-ratio. Therefore, the male population is fixed in both datasets, and based on the key characteristics of the existing female patients, additional female cases are simulated using the "survsim" package in R (R: A Language and Environment for Statistical Computing; Version 3.6.0; <https://www.R-project.org>). The simulated cases are added to the original datasets:

ICI-monotherapy cohort: 44 female subjects

ICI-chemotherapy cohort: 14 female subjects

### Results with additional simulated data:

| cohort           | analysis | n   | n female    | Median (95% CI) female vs. male | p-value (log rank) |
|------------------|----------|-----|-------------|---------------------------------|--------------------|
| ICI monotherapy  | PFS      | 272 | 136 (50.0%) | 3M (3-5) vs. 3M (3-5)           | 0.241              |
|                  | OS       | 272 | 136 (50.0%) | 10M (7-13) vs. 10M (8-14)       | 0.660              |
| ICI-chemotherapy | PFS      | 94  | 47 (50.0%)  | 5M (3-10) vs. 6M (5-10)         | 0.422              |
|                  | OS       | 94  | 47 (50.0%)  | 10M (9-NA) vs. 15M (10-NA)      | 0.231              |

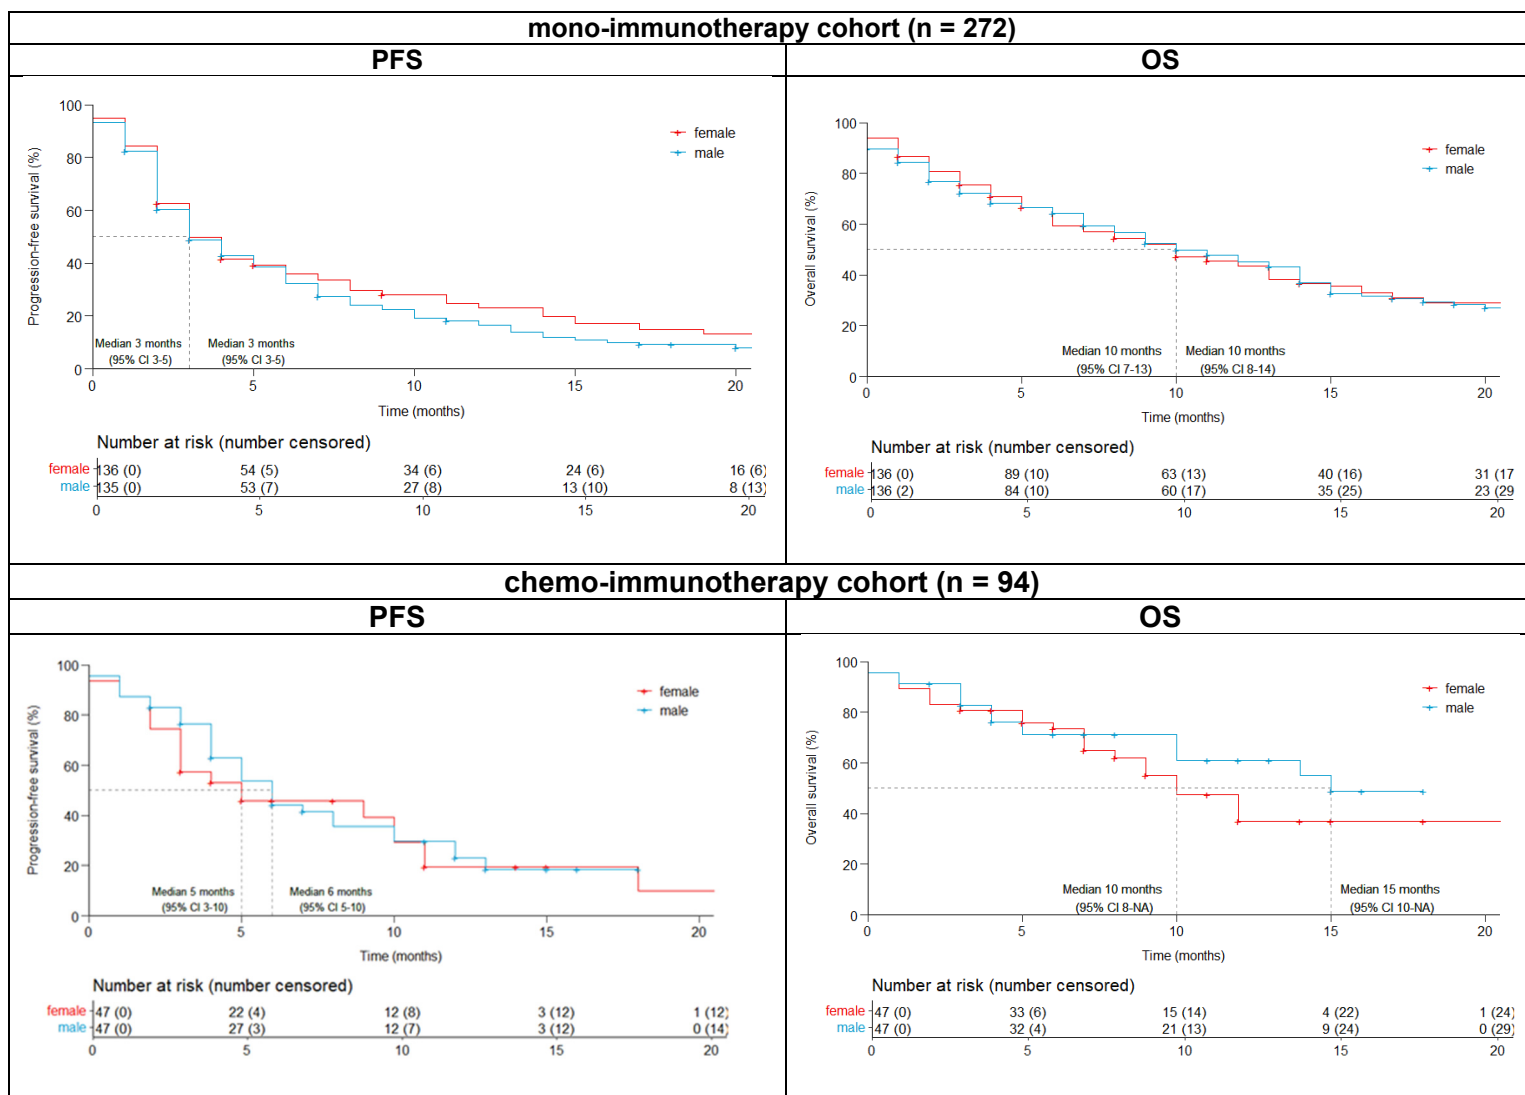

**Conclusion:** Simulation of a numerically balanced sex ratio in both therapy cohorts does not substantially alter PFS and OS outcomes.
